# Supplementary figures and images for: Solar driven high efficiency hydrogen evolution catalyzed by surface engineered ultrathin carbon nitride
Source: Royal Society of Chemistry journal article supplement (doi:10.1039/d0nj04653a), 2020-01-01

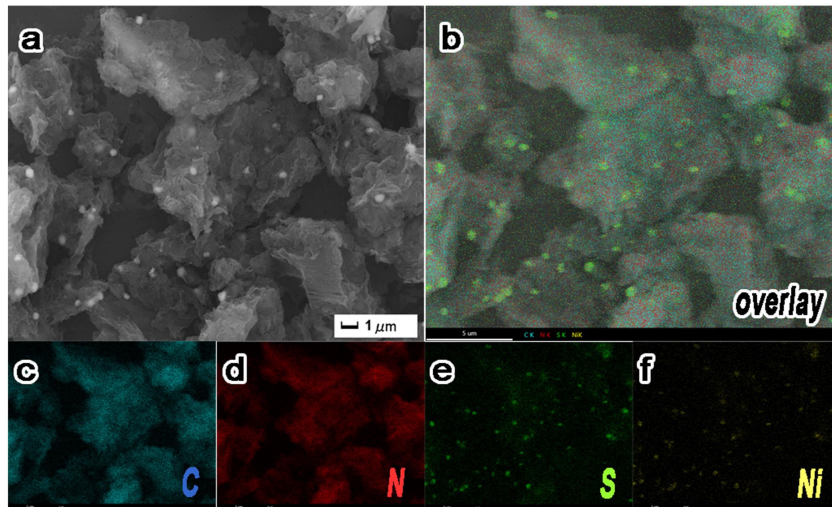

Supplement: d0nj04653a2.pdf [file d0nj04653a2.pdf]

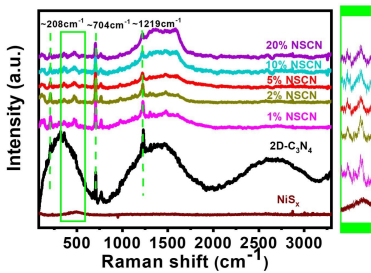

Supplement: d0nj04653a3.pdf [file d0nj04653a3.pdf]

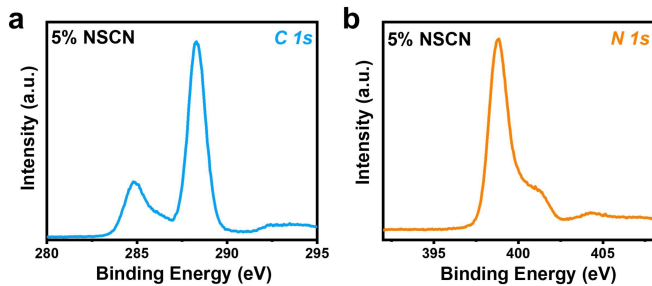

Supplement: d0nj04653a4.pdf [file d0nj04653a4.pdf]

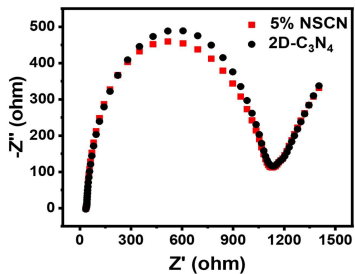

Supplement: d0nj04653a5.pdf [file d0nj04653a5.pdf]

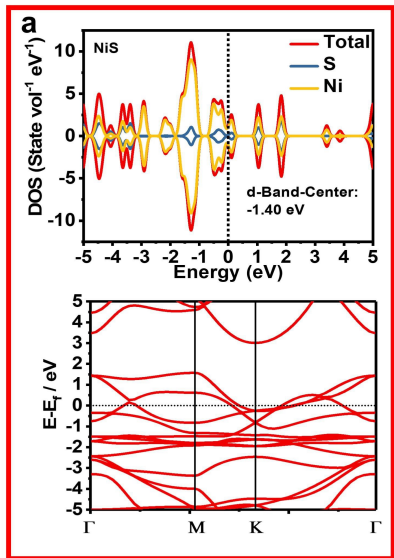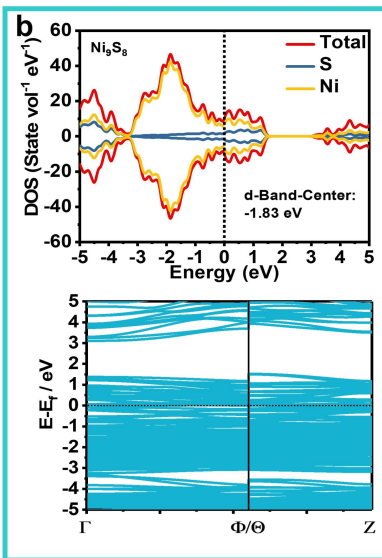

Supplement: d0nj04653a6.pdf [file d0nj04653a6.pdf]

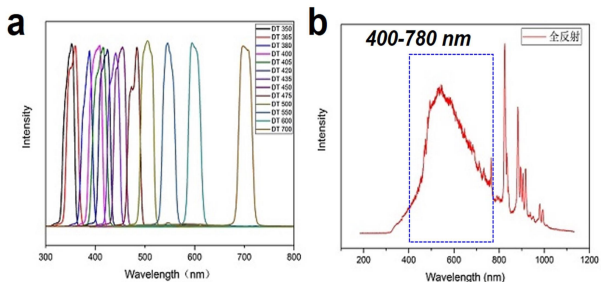

Supplement: d0nj04653a7.pdf [file d0nj04653a7.pdf]
